# Supplementary material for: Identification and Molecular Characterization of a Novel Carlavirus Infecting Chrysanthemum morifolium in China
Source: MDPI journal article supplement (doi:10.3390/v15041029), 2023-04-21
Supplement: s1 [file s1]

## Supplementary Figure S1

**a**

|              | CiCV1-CN CP | CiCV1 CP | CVR-ZJHU1 CP | CVR-ZJHU2 CP | CVR-TX CP | CVR-BJ CP | CVR-X21 CP | CVR-X6 CP | CVR-X13 CP |
|--------------|-------------|----------|--------------|--------------|-----------|-----------|------------|-----------|------------|
| CiCV1-CN CP  | –           | 96.4%    | 89.6%        | 89.9%        | 90.2%     | 88.9%     | 89.3%      | 90.2%     | 89.3%      |
| CiCV1 CP     | 96.4%       | –        | 88.6%        | 88.9%        | 89.3%     | 88.3%     | 88.9%      | 89.3%     | 88.3%      |
| CVR-ZJHU1 CP | 89.6%       | 88.6%    | –            | 99.3%        | 99.3%     | 94.5%     | 94.8%      | 91.9%     | 90.6%      |
| CVR-ZJHU2 CP | 89.9%       | 88.9%    | 99.3%        | –            | 99.3%     | 94.5%     | 94.8%      | 92.2%     | 90.9%      |
| CVR-TX CP    | 90.2%       | 89.3%    | 99.3%        | 99.3%        | –         | 95.1%     | 95.4%      | 92.5%     | 91.2%      |
| CVR-BJ CP    | 88.9%       | 88.3%    | 94.5%        | 94.5%        | 95.1%     | –         | 98.0%      | 92.8%     | 91.9%      |
| CVR-X21 CP   | 89.3%       | 88.9%    | 94.8%        | 94.8%        | 95.4%     | 98.0%     | –          | 93.5%     | 92.5%      |
| CVR-X6 CP    | 90.2%       | 89.3%    | 91.9%        | 92.2%        | 92.5%     | 92.8%     | 93.5%      | –         | 98.7%      |
| CVR-X13 CP   | 89.3%       | 88.3%    | 90.6%        | 90.9%        | 91.2%     | 91.9%     | 92.5%      | 98.7%     | –          |

**b**

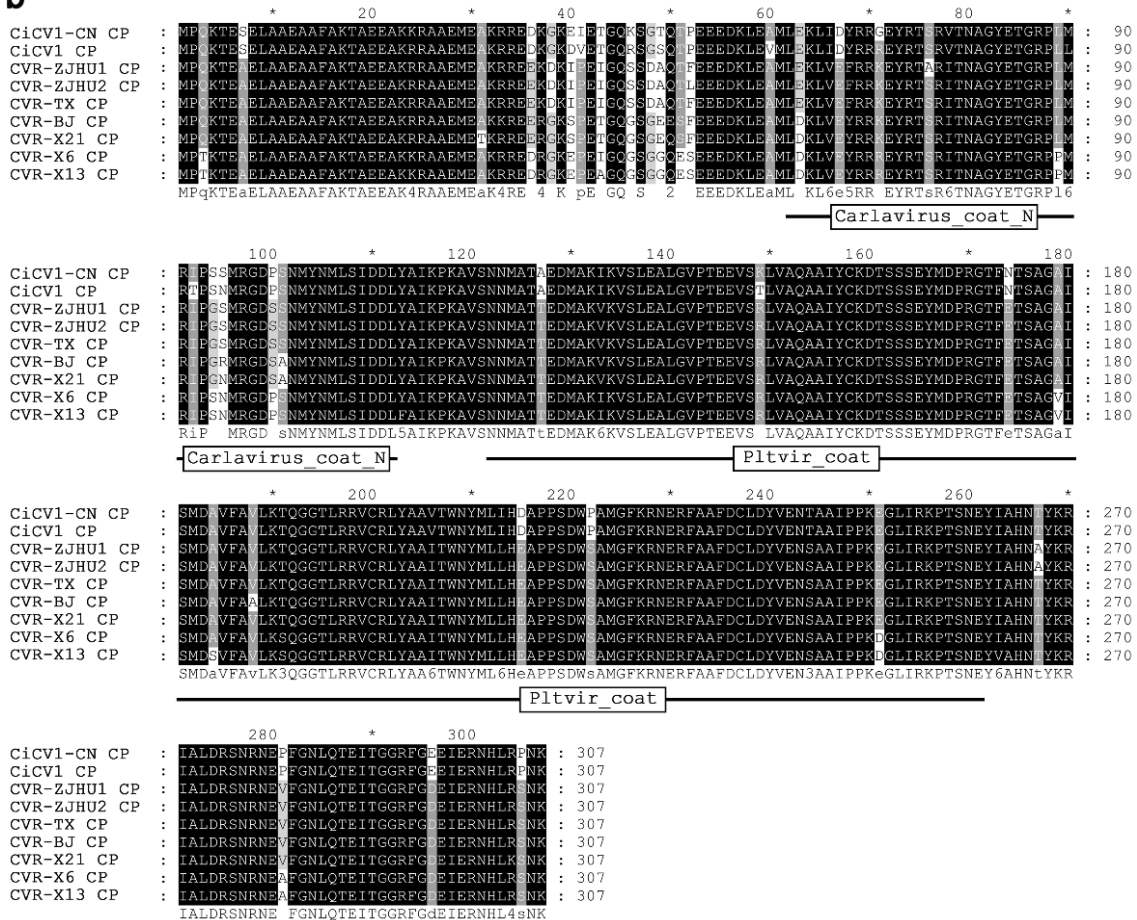

**Figure S1.** Alignments of amino acid sequences coat proteins (CPs) of the Chinese isolate of *Carya illinoensis* carlavirus 1 (CiCV1-CN) and the other eight carlaviruses. **(a)** Pairwise sequence alignment of the CPs of the carlaviruses using the EMBOSS Needle ([https://www.ebi.ac.uk/Tools/psa/emboss\\_needle/](https://www.ebi.ac.uk/Tools/psa/emboss_needle/)). **(b)** Amino acid sequence alignment of the CPs of the carlaviruses using the ClustalW program embedded in Molecular Evolutionary Genetics Analysis software (MEGA, v11.0), and the conserved domains were determined using the InterPro (<http://www.ebi.ac.uk/interpro/>). The following viruses were used in the amino acid sequence alignments: *Carya illinoensis* carlavirus 1 (CiCV1, MW328759), *Carya illinoensis* carlavirus 1 Chinese isolate (CiCV1-CN, OQ410649), chrysanthemum virus R isolate TX (CVR-TX, MN652896), chrysanthemum virus R isolate X13 (CVR-X13, MZ514907), chrysanthemum virus R isolate X21 (CVR-X21, MZ514905), chrysanthemum virus R isolate X6 (CVR-X6, MZ514906), chrysanthemum virus R isolate ZJHU1 (CVR-ZJHU1, ON137989), chrysanthemum virus R isolate ZJHU2 (CVR-ZJHU2, ON137990), and chrysanthemum virus R isolate BJ (CVR-BJ, MG432107).
