# Supplementary material for: Identification and Molecular Characterization of a Novel Carlavirus Infecting Chrysanthemum morifolium in China
Source: Viruses. 2023 Apr 21;15(4):1029. doi: 10.3390/v15041029 (PMC10141686; doi:10.3390/v15041029)
Supplement: Supplementary file 1 [file viruses-15-01029-s001.zip]

Archive with 6 entries (6 files):
- Supplementary Figure S1.pdf
- Supplementary Table S1.xlsx
- Supplementary Table S2.xlsx
- Supplementary Table S3.xlsx
- Supplementary Table S4.xlsx
- Supplementary Table S5.xlsx
