# Supplementary material for: Identification and Molecular Characterization of a Novel Carlavirus Infecting Chrysanthemum morifolium in China
Source: Viruses. 2023 Apr 21;15(4):1029. doi: 10.3390/v15041029 (PMC10141686; doi:10.3390/v15041029)
Supplement: Supplementary file 1 [file viruses-15-01029-s001.zip › Supplementary Table S1.xlsx]

## Sheet: Sheet1
Table S1. List of primers used in this study.
Primer namea	Sequence	Purpose
UPM	5'-CTAATACGACTCACTATAGGGC	RT-PCR
CiCV-CN-5'NGSP	5'-TCAGGCACCAAATCACGCAA	RT-PCR
CiCV-CN-3'NGSP	5'-CTGTACGCAATCAAACCAAAGG	RT-PCR
CiCV-CN-F1-F	5'-GGTCTCTCTAGGCATAGAATGTCG	RT-PCR
CiCV-CN-F1-R	5'-ACCAATAAACATAGAGTTTTGC	RT-PCR
CiCV-CN-F2-F	5'-CTGGCTACATGGGATCGAACC	RT-PCR
CiCV-CN-F2-R	5'-GATGCACATCCTCTCCAGAAC	RT-PCR
CiCV-CN-F3-F	5'-TCAAGGCCAAAGTGCAATTC	RT-PCR
CiCV-CN-F3-R	5'-CTGCGTCCATGGATATTGCTC	RT-PCR
PVXGFP-F	5'-CCTGGAGCGGCCGCGTCGACATGGTGAGCAAGGGCGAGGA	PVX construction
PVXGFP-R	5'-CGGCGGTCGATTAGTCGACTTACTTGTACAGCTCGTCCATG	PVX construction
PVXCiCV-CRP-F	5'-CCTGGAGCGGCCGCGTCGACATGAGTGACCGAGACTGTGC	PVX construction
PVXCiCV-CRP-R	5'-CGGCGGTCGATTAGTCGACTTAGATGCGGCCTAAGACGTC	PVX construction
PVXCiCV-CN-CRP-F	5'-CCTGGAGCGGCCGCGTCGACATGAGTGAGCGAGAATGCG	PVX construction
PVXCiCV-CN-CRP-R	5'-CGGCGGTCGATTAGTCGACTTAAATGCGACCCAGAACGTC	PVX construction
qCRP-F	5'-GGGTAACTCCTGGCTTTTACTA	qPCR
qCRP-R	5'-ATCACCTCAGTTACTCCAGTACG	qPCR
qPVXCP-F	5'-CTTTAGTACAGCCCGTGCCA	qPCR
qPVXCP-R	5'-GCCTGTGCCATAGTGTCTGT	qPCR
qNbACT-F	5'-CAATCCAGACACTGTACTTTCTCTC	qPCR
qNbACT-R	5'-AAGCTGCAGGTATCCATGAGACTA	qPCR
a Abbreviations: F, forward primer; R, reverse primer.
