# Supplementary material for: Identification and Molecular Characterization of a Novel Carlavirus Infecting Chrysanthemum morifolium in China
Source: Viruses. 2023 Apr 21;15(4):1029. doi: 10.3390/v15041029 (PMC10141686; doi:10.3390/v15041029)
Supplement: Supplementary file 1 [file viruses-15-01029-s001.zip › Supplementary Table S2.xlsx]

## Sheet: Sheet1
Table S2. Summary of the next-generation sequencing (NGS) of Chrysanthemum morifolium leaves infected with the Chinese isolate of Carya illinoinensis carlavirus 1 (CiCV1-CN).
Sample	Raw reads	Raw base (G)	Clean reads	Clean base (G)	Effective rate (%)	Error rate (%)	Q20 (%)	Q30 (%)	GC content (%)
CmHuzhou2020	84378724	12.66	82665768	12.4	97.97	0.03	97.65	93.1	42.77
