# Supplementary material for: Identification and Molecular Characterization of a Novel Carlavirus Infecting Chrysanthemum morifolium in China
Source: Viruses. 2023 Apr 21;15(4):1029. doi: 10.3390/v15041029 (PMC10141686; doi:10.3390/v15041029)
Supplement: Supplementary file 1 [file viruses-15-01029-s001.zip › Supplementary Table S3.xlsx]

## Sheet: Sheet1
Table S3. Contigs mapped in the genome of the Chinese isolate of Carya illinoinensis carlavirus 1 (CiCV1-CN).
Contig name	Contig ID	Sequence	Size (nt)
Contig 1	TRINITY_DN394_c0_g1_i13	AAACTTGAGGAGGAAAATTTCTCCGATAAACCACACATAACATAAACATACTTTAAATAAATTAAACTCTAATTCATTTAAAGTACGTTAGCATGGCTCTTACATACCGCAGCCCAATTGCAGATGTTATAACTAATTTTGATCCATCAATCAACTCCATAATCGCCACTACAGCTGCCGAGCATTACAAGAAACTTGAGGAGGATAATTTCGCGCTATTCAATTATGCCATGTCACCGCAAACGACACAGCATTTGATAGGTGCAGGAATTTACCTTAGCCCCTTTTCTGGGGTACCTCACTCGCATCCGGCCTGCAAGACTTTGGAGAATTACATTTTGTACATAGTTTTACCACAGTATTTAGACAATAGTTTTTACTTTGTAGGTATTAAAGATT…	5278
Contig 2	TRINITY_DN706_c0_g3_i1	TTTTTGCAACTCCTTACCATCAATTCAGGCACCAAGTCACGCAATGTGGGGCCTTCAAGCGACATTCTATGCCTAGAGAGACCTGCGTGAGGTTTTGAGTGCCTAACAACGAAGTCGGATGGGTAGCGTAGTTTATCTTGACTCGTGACGTACCTGTTGATACATTGTACCATATTTGTGTGTTTGTGACGTGCTTTAAGTGCATTGAGTTTAAAATCTTTAATACCTACAAAGTAAAAACTATTATCTAAATACTGTGGTAAAACTATATACAAAATGTAATTCTCCAAAGTCTTGCAGGCCGGATG	308
Contig 3	TRINITY_DN11538_c1_g1_i1	TGTTTATGCTCTTATTTGACCACTTCAACAGTTCGGGTGGGTACAAAATTGTGGCAAGTACCAATTGAGGTTGCACGACTTCGAGAAACTTGCACAACTCGTCAATCTTCCAGTAATTCAACTCATCATGAAGGAATAGCTTTTTGCAACTCCTTACCATCTATTCAGGCACGAAGTCACGCTATGTGGGACCTTCAAGTGACATTCTATGCCTGGAGAGACCTGCGTGAGGTTTTGAGTGCCTAACGACGAAGTCAGATGGGTAGCGTAGTTTATCTTGACTCGTGACGTACCTGTTGATTCATTGTACCATATTGGTGTGTTTGAGACGTGCTTTAAGTGCATTGAGTTTAAAATCTTGTATACCTACAAAGTAAAAACTATTATCTAAATCCTGTG…	431
Contig 4	TRINITY_DN27957_c1_g1_i1	AACTCTGAACTACAAACATCGGGGCTCCCTATCGAGCACTTCATTGTTAACCCTGAACTTGCCAGCGAGATTTGGCTTCTTGTTAAAGAGTGAAGAACTCACTACCCCAGTAGCGCCAGCGCACAAACAATCTTCCAATCTCCTTGCTCTTGCTAGGGTGCTCTTATACTTGATGTTGGTGCACGCTTTATTCAAAAGTTCTAGTGACTCAGCCTTCACTCCCACTTTCTGACCGCATTCTTCAAATAACCTACCGCAGGCACTCTTCTTCCGCAACGTGTGTTCAATGTGATCCCCATCAATTTCGAAAGAGGCTCCAAAACGACCTTCTCTGTTGTACAGGACCTCTTTGCCATTCTCAAAAATGAGTGCTTTGATAGAGAAAAGTTCAAGTAATGC…	490
Contig 5	TRINITY_DN394_c7_g1_i2	CAAGTTTTTTGAAGAATGTGGTCAGAAGTTCGGGGTGATGGCTGAATCACTAGAACTTTTGAATAAAGCGGTCACCAACATCAAGTATAAGAGCACCCTCGCAAGAGCAAGGAGATTGGCAGATAGTTTGTGCGCTGGCGCAACTGGGGTAGTGAGTTCTTCACTCTTTAACAAGAAGCCAAATCTCGCTGGCAAGTTCAGGGTTAACAATGAAGTGCACGATAGAGATGTCCTCGCAGTTATTGGAACATTCGGCTCAGGCAAGAGTACAATATTGAAGAATTTTTTTAAAATCAATCTCGGCCGTAAAGTGCTGTATGTTTCCCCGAGGAAGGCACTCCTTGAAGAATTTTACGTCAATGTTTGTGGAGTGGCCAGGAGGAAGGGACCCAAAAAACA…	544
Contig 6	TRINITY_DN11385_c1_g1_i1	TGCTCAAGGTTACGTACTTATATACTTGGCCGTTCAAAAGTTTACTGTGATCGGGTTCAATCCCATGTAGCCAGACCCTATCCATTTCACTATCATAAAAACTTTGATCTGGGTCACCCCCGACTACAATGTGCACACCATCGTAGATAAGATAGCAAACCAGGTCTAAGAACCCAGGGGGGTACAATTGTATCTCAACAAGGATCACAGCCAAGCCTGCTGGCAATATCGAACAGATTAGGATGAATGACTCGAAAGTCATAAAATCCCAGTTTTCCTGCCCTTTCTTGCACTGTTTCTTGGGCCCCGTCTTCCTGGCCACCCCACATACATTGAGGTGAAACTCTACAATTAGTGACTTACTCGGGGAGACATAAAACACTATGCGTCCGAGATTGA…	624
Contig 7	TRINITY_DN11385_c0_g1_i1	ATGGCTTAGAAAAGCGCAATCTCGTGCGCACTGCCTTTACAAAAGTGACTGTATAGCTAGATCTATGCCTGGGGTATATTGCTTCGAATCTTTCCGCGGCATTTGTGAGCTGCTTGCCCTTTTCCTTGCTATGCTCATCAGCGAATTGCTCGGACACAATGTCACCCATCCTGACCTCTCTTGCTTCCTTGGCGAGTATTTTATGTACCCAACGCGCTCTCACACTTTCTAGCTCCTCTTGCGGTAAATGTGTCTTGAACCATTCCTCTCTAGCAATCTCGCTGACCACGCTGACCTCTTCCTCAACGTCTTCAATTTGCAGAAGGTCAATCATAGTTTTTAGCCAGGGGTCCCCAGCTAATTTCTCCTCACGCACCCCCTCCTCAGCACCCATGGTTG…	1430
Contig 8	TRINITY_DN394_c1_g1_i10	TTTTTTTTTTTTTTTTTTTTTTTGAAAGGAAAAATACTTTAAAACTTTCTTATTTTTATAGTTGCACACTTATAAATTATTTAGGCTTTATACGCAACATTAAATGCGACCCAGAACGTCTGGTATCACCTCAGTTACTCCAGTACGAACGTAAGTCGCGATTTTCTCATTATATGAGATACCAGGTTTGCAATTCACACCATCACACCTACTAGTGTAGTAAAAGCCAGGAGTTACCCGGTAGCAACGGTGGCATCTACCCACCTTAGCTGCCCGCCTACGTCTGGCGTAGGAGCTTTTACCAAAACCAGGGGCGTACCCCTTGGTCTTCGAAATTATTAAGTAGCACACATCTAAATTAGTCACACCACACACTTTAAACATACACTCAGATAGAGC…	4062
Contig 9	TRINITY_DN140240_c2_g1_i2	CGTCAAAACCATGATTCCTCACCCAATGGTCCAGCTCTTCTAGACCCTTGCCAGAATGAATGTAAAACCTATCGGGCAGAGATTCTCTCAGCTTGAGCTCTATGTACCTCATGTAAGGTGCAAACCTGACGAGCACAGAGTGTTGGAAGCATACGATGGACTGCGCTGCCTTGGCGGTGCTAAATCTTTTCTCGAACTTTGTGCAGATTTGACTCTTCGAGAAGATCTGCCCGATGTCGATTAACCAATCCCGCGTGGAACGGATGCTGTGATTCTCTATAATCGCGGCAGATTTGCTCACTTTTTTCGTTTCGAACTCCATTTTCGCTTGCGCCATGAGTATTGGGTCTCTATTCGGCTTCAACGGCACGTGCTTGAGGAACTTTTTCAGCAGCATAG…	563
Contig 10	TRINITY_DN981_c0_g1_i1	AGTCCATCGTATGCTTCCAACACTCTGTGCTCGTCAGGTTTGCACCTTACATGAGATACATAGAGCTCAAGCTGAGAGAATCTCTGCCCGATAGGTTTTACATCCATTCTGGCAAGGGTCTAGAAGAGCTAGACCATTGGGTGAGGAATCATGGTTTTGACGGTGTTTGCACAGAGTCAGATTACGAAGCTTTTGATGCTTCTCAAGATCAATACATCGTTGCCTTTGAGTTAGCCCTAATGGGCTACTTGGGTTTGCCCCAAAGTCTAATCGCTGATTACGAGTACATTAAAACGCATTTGGGGTCTAAGCTGGGGTCCTTCGCGATAATGAGGTTTTCTGGTGAAGCTAGTACTTTCTTGTTTAACACCATGGCTAATATGTTATTCACGTTCATGA…	682
Contig 11	TRINITY_DN140240_c1_g1_i2	ATTCTTTGGCTTGAATTTTTCGCCTGATGGTATTTATAAGAAGCCCCAGTTGGTTCTGGAGAGGATGTGCATCGCTAAAGAAACGAATAATCTGCACAATTGCATTGACAATTACGCCATTGAAGTTTCATACGCATACAAAATGGGTGAGAAGGCAGTGAATAGAATGGATGAAGAAGAGTTGGCTGCATATTATAACTGCGTTCGCATCATCGTCAAAAATAGGCACTTGCTACGTTCGAATGTCTCCGAAGTGTACGGAAACAGGGCTTGGTAGCTTAGGTTGTTGCTAATGTATTGATATATGGATGTGTTAGTTAATTTAGCTAAGAAATACAATTTTAACAGAGTTAGTACTACTTTAAATAAGCCGATAGTTTTTCATTGTGTTCCGGGGGC…	621
Contig 12	TRINITY_DN17154_c0_g1_i3	CCAAGCCTTTGGTTTGATGGCACGTGAGAACTCTATAAGATCCCTATTGATTACGCAATTTATTGCTCTAAAAGACTCACCAGTAACTACAACCACACACTCGTGCGACACACTACTGTAATATTGGGCAAGCAAAACAGTCAAACAAACTACGAAACCTAGTATTAGATACAAAAACATTAAAGGTTATGGCCGCAGATCACACAACAGTTGGGAAATTTTAAGGTTGAGAGAATAATCAGCCCCACCAAGATGATCACGATAGCCCAGGGTTGTCCGATCAAGAAGCCTTGTTTTTCTACTGAATTCAGCTTATCAGGTCTGCCGTAATACACTTGCTTAGTCCCGTCTTTGTACCACCCACCGTGTGGCAATGAATGCGCTTGATCGCCGGTAAAG…	450
Contig 13	TRINITY_DN22002_c4_g1_i1	AACAGGTTTGCAATTCACACCATCACACCTACTAGTGTAGAAAAAGCCAGGAGTTACCCGTTAGCAACGGTGTCATCTGCCCACTTTAGCTGCCCGCCTACGTCTGGCGTAGGAGATTTTACCAAAACCAGGGTCGTACCCATAGTTCTACGAAATTATTAAGTAGCACACATCTAAATTAGTCACACCACACACTTTAAACAGACACTCAGATAGAGCAATAGCGCATTCTCGCTCACTAATTATTTATTCGGCCTCAAATGATTGCGCTCAATCTCTTCTCAAAAACGTCCGCCAGTTATCTCAGTCTGCAGATTACCGAAAGGTTCAGTCCGGTTGGACCTATCCAGAGCAATCCGCTTGTAGGTATTGTGAGCTATGTATTCATTGCTTGTTGGC…	673
