# Supplementary material for: Identification and Molecular Characterization of a Novel Carlavirus Infecting Chrysanthemum morifolium in China
Source: Viruses. 2023 Apr 21;15(4):1029. doi: 10.3390/v15041029 (PMC10141686; doi:10.3390/v15041029)
Supplement: Supplementary file 1 [file viruses-15-01029-s001.zip › Supplementary Table S4.xlsx]

## Sheet: Sheet1
Table S4. Nucleotide and protein sequence identities (%) of the Chinese isolate of Carya illinoinensis carlavirus 1 (CiCV1-CN) and 31 reported carlaviruses.
Viruses	Accession no.	Full-length genome (nta)	Replicase-related protein (aab)	Coat protein (aab)
CiCV1	MW328759	0.828	0.913	0.964
CVR-X6	MZ514906	0.713	0.767	0.902
CVR-X13	MZ514907	0.711	0.77	0.893
CVR-BJ	MG432107	0.71	0.768	0.889
CVR-X21	MZ514905	0.709	0.771	0.893
CVR-ZJHU1	ON137989	0.707	0.76	0.896
CVR-ZJHU2	ON137990	0.704	0.762	0.899
CVR-TX	MN652896	0.704	0.762	0.902
CVB-UK	AM765838	0.609	0.618	0.398
CVB-UP	AM765837	0.607	0.621	0.419
CVB-PB	AM493895	0.606	0.617	0.461
CVB-TN	AM765839	0.605	0.616	0.436
CVB-FY	MZ514910	0.569	0.47	0.467
GalLV	KJ415259	0.567	0.473	0.489
PVM	D14449	0.567	0.43	0.489
PhVS	EF492068	0.566	0.466	0.456
CVB-GS2	MZ514909	0.564	0.47	0.452
CVB-GS1	MZ514908	0.564	0.473	0.458
DVS	AJ620300	0.564	0.475	0.476
CVB-HZ2	MW269553	0.563	0.469	0.45
CVB-CN5	MW691877	0.563	0.471	0.419
CVB-S	AB245142	0.563	0.467	0.464
PVH	JQ904630	0.563	0.448	0.474
HpLV	KP861891	0.562	0.461	0.505
CVB-CN2	MW691876	0.562	0.471	0.447
NCLV	AM158439	0.56	0.459	0.524
CVB-HZ1	MW269552	0.559	0.465	0.458
AcLV	AB051848	0.557	0.459	0.542
PhVB	EU162589	0.554	0.472	0.412
PotLV	EU433397	0.553	0.439	0.454
CPMMV	KC884246	0.539	0.429	0.483
a nt, nucleotide; b aa, amino acid.
