# Supplementary material for: Identification and Molecular Characterization of a Novel Carlavirus Infecting Chrysanthemum morifolium in China
Source: Viruses. 2023 Apr 21;15(4):1029. doi: 10.3390/v15041029 (PMC10141686; doi:10.3390/v15041029)
Supplement: Supplementary file 1 [file viruses-15-01029-s001.zip › Supplementary Table S5.xlsx]

## Sheet: Sheet1
Table S5. Recombination analysis of the Chinese isolate of Carya illinoinensis carlavirus 1 (CiCV1-CN) and 31 reported carlaviruses using the RDP4 software.
Program	CiCV1-CN		CiCV1-CN		CiCV1-CN
	CVB-PB	CVB-UP	CVB-GS2	CVR-X13	CVR-ZJHU1	CVB-HZ1
RDP	>1.0		-		-
GENECONV	6.001×10-31		-		-
BootScan	-		-		-
MaxChi	>1.0		2.728×10-03		6.905×10-05
Chimacra	>1.0		4.147×10-05		2.821×10-03
SiScan	-		6.983×10-41		2.089×10-106
3Seq	-		1.488×10-02		1.689×10-02
